# Supplementary material for: The small FOXP1 isoform predominantly expressed in activated B cell-like diffuse large B-cell lymphoma and full-length FOXP1 exert similar oncogenic and transcriptional activity in human B cells
Source: PubMed Central journal article supplement — Haematologica. 2016 Nov 29;102(3):573–83. doi: 10.3324/haematol.2016.156455 (PMC5394978; doi:10.3324/haematol.2016.156455), 2017-03
Supplement: 2016_156455-Disclosures_and_Contributions.pdf [file 2016_156455-Disclosures_and_Contributions.pdf]

Haematologica  
HAEMATOL/2016/156455  
Version 2

The small FOXP1 isoform predominantly expressed in activated B cell-like diffuse large B-cell lymphoma and full length FOXP1 exert similar oncogenic and transcriptional activity in human B cells

Martine van Keimpema, Leonie J. Grüneberg, Esther J.M. Schilder-Tol, Monique E.C.M. Oud, Esther Beuling, Paul J. Hensbergen, Johann de Jong, Steven T. Pals, and Marcel Spaargaren

Disclosures: The authors have no conflict-of-interest. This research is supported by a grant from the Dutch Cancer Society

Contributions: MvK performed research and data analysis and wrote the manuscript, LJG, EJS, MEO, EB, PJH and JdJ performed research and data analysis, STP supervised the study, MS performed data analysis, wrote the manuscript and supervised the study.
